# Supplementary material
Source: HighWire-hosted journal article supplement (https://lupus.bmj.com/content/8/1/e000573)

### Supplementary Figure 2

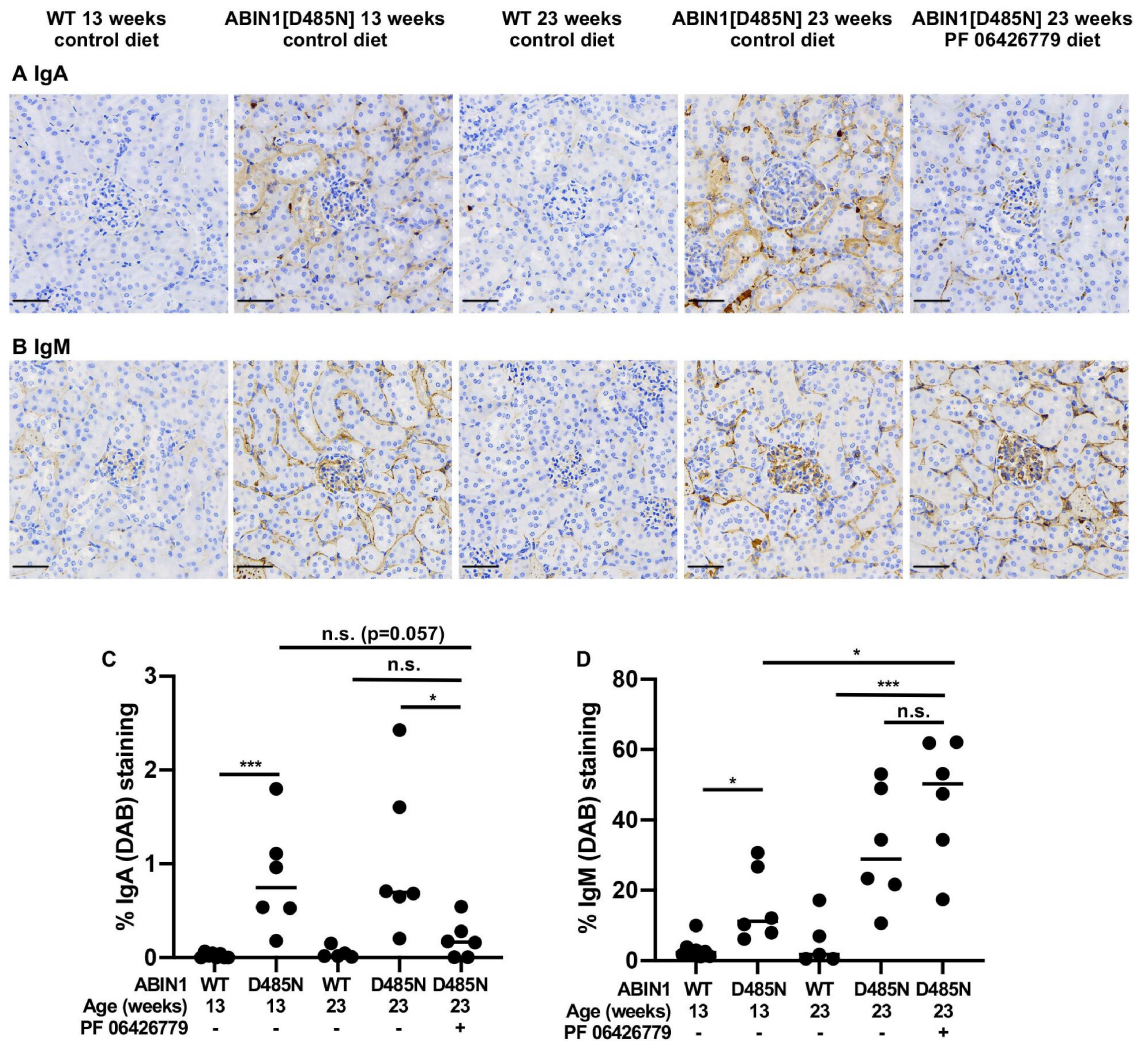

Supplement: inline-supplementary-material-2 [file inline-supplementary-material-2.pdf]
